# Supplementary material for: Trajectories of CKD-MBD biochemical parameters over a 2-year period following diagnosis of secondary hyperparathyroidism: a pharmacoepidemiological study
Source: PubMed Central journal article supplement — BMJ Open. 2017 Mar 27;7(3):e011482. doi: 10.1136/bmjopen-2016-011482 (PMC5372074; doi:10.1136/bmjopen-2016-011482), 2017-03-27
Supplement: bmjopen-2016-011482supp_table3.pdf [file bmjopen-2016-011482supp_table3.pdf]

**Table S3. Table of compliance between groups defined by GBTM according to the exclusion or not of patients with less than four available biological measurements**

|                                               | From the sample of patients with at least four available values |                              |                                               |                           |
|-----------------------------------------------|-----------------------------------------------------------------|------------------------------|-----------------------------------------------|---------------------------|
|                                               | "Rapid PTH drop" group                                          | "Gradual PTH decrease" group | "Slow PTH decrease with high phosphate" group | "Uncontrolled SHPT" group |
| <b>From the entire sample</b>                 |                                                                 |                              |                                               |                           |
| "Rapid PTH drop" group                        | 31                                                              | 0                            | 0                                             | 0                         |
| "Gradual PTH decrease" group                  | 1                                                               | 89                           | 0                                             | 0                         |
| "Slow PTH decrease with high phosphate" group | 0                                                               | 0                            | 99                                            | 0                         |
| "Uncontrolled SHPT" group                     | 0                                                               | 0                            | 0                                             | 31                        |

**Abbreviations:** GBTM=group-based trajectory modeling; PTH=parathyroid hormone; SHPT=secondary hyperparathyroidism
